# Supplementary material for: Paratonia in Dementia: A Systematic Review
Source: PubMed Central journal article supplement — J Alzheimers Dis. 2020 Dec 8;78(4):1615–37. doi: 10.3233/JAD-200691 (PMC7836054; doi:10.3233/jad-200691), 2020-12-08
Supplement: jad-78-jad200691-s001.pdf [file jad-78-jad200691-s001.pdf]

# Supplementary Material

## Paratonia in Dementia: A Systematic Review

**Supplementary Table 1.** Preferred Reporting Items for Systematic Reviews and Meta-Analyses: The PRISMA Statement.

| Section/topic                      | #  | Checklist item                                                                                                                                                                                                                                                                                              | Reported on page # |
|------------------------------------|----|-------------------------------------------------------------------------------------------------------------------------------------------------------------------------------------------------------------------------------------------------------------------------------------------------------------|--------------------|
| <b>TITLE</b>                       |    |                                                                                                                                                                                                                                                                                                             |                    |
| Title                              | 1  | Identify the report as a systematic review, meta-analysis, or both.                                                                                                                                                                                                                                         |                    |
| <b>ABSTRACT</b>                    |    |                                                                                                                                                                                                                                                                                                             |                    |
| Structured summary                 | 2  | Provide a structured summary including, as applicable: background; objectives; data sources; study eligibility criteria, participants, and interventions; study appraisal and synthesis methods; results; limitations; conclusions and implications of key findings; systematic review registration number. |                    |
| <b>INTRODUCTION</b>                |    |                                                                                                                                                                                                                                                                                                             |                    |
| Rationale                          | 3  | Describe the rationale for the review in the context of what is already known.                                                                                                                                                                                                                              |                    |
| Objectives                         | 4  | Provide an explicit statement of questions being addressed with reference to participants, interventions, comparisons, outcomes, and study design (PICOS).                                                                                                                                                  |                    |
| <b>METHODS</b>                     |    |                                                                                                                                                                                                                                                                                                             |                    |
| Protocol and registration          | 5  | Indicate if a review protocol exists, if and where it can be accessed (e.g., Web address), and, if available, provide registration information including registration number.                                                                                                                               |                    |
| Eligibility criteria               | 6  | Specify study characteristics (e.g., PICOS, length of follow-up) and report characteristics (e.g., years considered, language, publication status) used as criteria for eligibility, giving rationale.                                                                                                      |                    |
| Information sources                | 7  | Describe all information sources (e.g., databases with dates of coverage, contact with study authors to identify additional studies) in the search and date last searched.                                                                                                                                  |                    |
| Search                             | 8  | Present full electronic search strategy for at least one database, including any limits used, such that it could be repeated.                                                                                                                                                                               |                    |
| Study selection                    | 9  | State the process for selecting studies (i.e., screening, eligibility, included in systematic review, and, if applicable, included in the meta-analysis).                                                                                                                                                   |                    |
| Data collection process            | 10 | Describe method of data extraction from reports (e.g., piloted forms, independently, in duplicate) and any processes for obtaining and confirming data from investigators.                                                                                                                                  |                    |
| Data items                         | 11 | List and define all variables for which data were sought (e.g., PICOS, funding sources) and any assumptions and simplifications made.                                                                                                                                                                       |                    |
| Risk of bias in individual studies | 12 | Describe methods used for assessing risk of bias of individual studies (including specification of whether this was done at the study or outcome level), and how this information is to be used in any data synthesis.                                                                                      |                    |

|                      |    |                                                                                                                                                           |  |
|----------------------|----|-----------------------------------------------------------------------------------------------------------------------------------------------------------|--|
| Summary measures     | 13 | State the principal summary measures (e.g., risk ratio, difference in means).                                                                             |  |
| Synthesis of results | 14 | Describe the methods of handling data and combining results of studies, if done, including measures of consistency (e.g., $I^2$ ) for each meta-analysis. |  |

From: Moher D, Liberati A, Tetzlaff J, Altman DG, The PRISMA Group (2009). PLoS Med 6(7): e1000097. doi:10.1371/journal.pmed1000097

**Supplementary Table 2.** Critical Appraisal of the included studies

| <b>Author/year</b>                  | <b>Design</b>                                               | <b>Checklist / Total items</b>         | <b>Remarks</b>                                                                                                                                                                                                                                                                                                                               | <b>Score*</b> |
|-------------------------------------|-------------------------------------------------------------|----------------------------------------|----------------------------------------------------------------------------------------------------------------------------------------------------------------------------------------------------------------------------------------------------------------------------------------------------------------------------------------------|---------------|
| <b>Bautmans et al., 2008</b>        | RCT                                                         | Randomized Controlled Trials / 13      | → items 1,2; unclear<br>→ item 4; participants blind for treatment assignment scored yes based on the severity of dementia although this was not addressed by the authors<br>→ item 5; therapists were not blind for treatment assignment                                                                                                    | 10/13         |
| <b>Benassi et al., 1990</b>         | Cross-sectional                                             | Analytical Cross-Sectional Studies / 8 | → item 3; exposure measured in a valid way was not applicable<br>→ item 5; no confounding factors identified<br>→ item 6; no strategies for dealing with confounding factors stated<br>→ item 7; unclear if outcomes were measured in a valid and reliable way<br>→ item 8; unclear if appropriate statistical analysis is used              | 3/7           |
| <b>Bennet et al., 2002</b>          | Cohort                                                      | Cohort studies / 11                    | → item 6; unclear if the participants were free of the outcome at the start of the study                                                                                                                                                                                                                                                     | 8/9           |
| <b>Beversdorf and Heilman, 1998</b> | Cross-sectional                                             | Analytical Cross-Sectional Studies / 8 | → item 3; exposure measured in a valid way was not applicable<br>→ item 4; no objective, standard criteria used for assessing the condition<br>→ item 5; no confounding factors identified<br>→ item 6; no strategies for dealing with confounding factors stated<br>→ item 7; unclear if outcomes were measured in a valid and reliable way | 3/7           |
|                                     | Measurement                                                 | Diagnostic Test Accuracy Studies / 10  | → item 2; case control design was not avoided<br>→ item 5; usage of a threshold was not applicable<br>→ item 6; unclear if the reference standard used correctly classified the target condition (used reference standard was not validated)                                                                                                 | 7/9           |
| <b>Critchley, 1956</b>              | Narrative review/ Viewpoint                                 | Text and Opinion / 6                   | → item 6; incongruence with the literature/sources not logically defended                                                                                                                                                                                                                                                                    | 5/6           |
| <b>Damasceno et al., 2005</b>       | Cross-sectional                                             | Analytical Cross-Sectional Studies / 8 | → item 3; exposure measured in a valid way was not applicable<br>→ item 5; unclear if confounding factors were identified<br>→ item 6; unclear about the strategies to deal with confounding                                                                                                                                                 | 5/7           |
| <b>Drenth et al., 2017</b>          | Prospective study, 6 months on psychometric properties test | Diagnostic Test Accuracy Studies / 10  | → item 6; PAI used as reference standard                                                                                                                                                                                                                                                                                                     | 10/10         |
| <b>Drenth et al., 2017</b>          | Cohort                                                      | Cohort studies / 11                    | → item 2; similarity of exposure in groups not applicable                                                                                                                                                                                                                                                                                    | 9/9           |

|                                    |                                                 |                                        |                                                                                                                                                                                                                                                                                                                                                |       |
|------------------------------------|-------------------------------------------------|----------------------------------------|------------------------------------------------------------------------------------------------------------------------------------------------------------------------------------------------------------------------------------------------------------------------------------------------------------------------------------------------|-------|
|                                    |                                                 |                                        | → item 6; participants were not free of the outcome at the start so not applicable                                                                                                                                                                                                                                                             |       |
| <b>Duret et al., 1989</b>          | RCT                                             | Randomized Controlled Trials / 13      | → item 2; concealment allocation unclear<br>→ item 3; similarity treatment groups at baseline unclear                                                                                                                                                                                                                                          | 11/13 |
| <b>Franssen et al., 1991</b>       | Cross-sectional                                 | Analytical Cross-Sectional Studies / 8 | → item 3; exposure measured in a valid way was not applicable<br>→ item 7; unclear if outcomes were measured in a valid and reliable way                                                                                                                                                                                                       | 6/7   |
| <b>Franssen et al., 1993</b>       | Case series                                     | Case series / 10                       | → item 6; only age and gender were reported on demographics<br>→ item 8; Outcomes on intervention or treatment was not applicable                                                                                                                                                                                                              | 8/9   |
| <b>Hobbelen et al., 2003</b>       | Pilot RCT                                       | Randomized Controlled Trials / 13      | → item 4; participants blind for treatment assignment scored yes based on the severity of dementia although this was not addressed by the authors<br>→ item 5; therapists were not blind for treatment assignment<br>→ item 13; unclear because the trial design seems not appropriate for the intervention group 'good stabilizing cushions'. | 11/13 |
| <b>Hobbelen et al., 2006</b>       | Delphi procedure for consensus definition       | Text and Opinion / 6                   |                                                                                                                                                                                                                                                                                                                                                | 6/6   |
| <b>Hobbelen et al., 2008</b>       | Cross-sectional on psychometric properties test | Diagnostic Test Accuracy Studies / 10  | → item 6; reference standard used not applicable<br>→ item 7; reference standard vs index test not applicable<br>→ item 8; appropriate interval between reference test and index test not applicable<br>→ item 9; did all patients received same reference standard not applicable                                                             | 6/6   |
| <b>Hobbelen et al., 2011</b>       | Cohort                                          | Cohort studies / 11                    | → item 2; similarity of exposure in groups not applicable                                                                                                                                                                                                                                                                                      | 10/10 |
| <b>Hobbelen et al., 2012</b>       | RCT                                             | Randomized Controlled Trials / 13      | → item 5; blinding treatment assignment therapists unclear                                                                                                                                                                                                                                                                                     | 12/13 |
| <b>Jenkyn et al., 1977</b>         | Cross-sectional                                 | Analytical Cross-Sectional Studies / 8 | → item 3; exposure measured in a valid way was not applicable                                                                                                                                                                                                                                                                                  | 7/7   |
| <b>Kleiner-Fisman et al., 2014</b> | RCT                                             | Randomized Controlled Trials / 13      | → item 11; reliability outcome measurements unclear                                                                                                                                                                                                                                                                                            | 12/13 |
| <b>Kurlan et al., 2000</b>         | Narrative review/ Viewpoint                     | Text and Opinion / 6                   |                                                                                                                                                                                                                                                                                                                                                | 6/6   |
| <b>Marinelli et al., 2017</b>      | Cross-sectional on psychometric properties test | Diagnostic Test Accuracy Studies / 10  | → item 2; case control design was not avoided<br>→ item 6; unclear if the used reference standard (not validated) correctly classified the target condition                                                                                                                                                                                    | 8/10  |
| <b>O'Keeffe et al., 1996</b>       | Cross-sectional                                 | Analytical Cross-                      | → item 3; exposure measured in a valid way was not applicable                                                                                                                                                                                                                                                                                  | 6/7   |

|                                   |                                                 |                                        |                                                                                                                                                                                                                                                                                                                                                                                                                                                               |      |
|-----------------------------------|-------------------------------------------------|----------------------------------------|---------------------------------------------------------------------------------------------------------------------------------------------------------------------------------------------------------------------------------------------------------------------------------------------------------------------------------------------------------------------------------------------------------------------------------------------------------------|------|
|                                   |                                                 | Sectional Studies / 8                  | → item 7; unclear if outcomes were measured in a valid and reliable way                                                                                                                                                                                                                                                                                                                                                                                       |      |
| <b>Peralta and Cuesta, 2017</b>   | Narrative review                                | Text and Opinion / 6                   |                                                                                                                                                                                                                                                                                                                                                                                                                                                               | 6/6  |
| <b>Pauc and Young, 2012</b>       | Narrative review                                | Text and Opinion / 6                   | → item 2; Unclear, because we are not sure that the authors (chiropractic clinic) have some standing within the field.<br>→ item 3 and 4; unclear because reference is made to the Ajugueria (1968) study which allegedly states that Dupré (1910) indicated that paratonia was originally a term used in children and Gegenhalten in dementia. This is not right. Table 1. used on the Delphi consensus by Hobbelen et al. (2006) also contains inaccuracies | 3/6  |
| <b>Paulson and Gottlieb, 1968</b> | Narrative review                                | Text and Opinion / 6                   | → item 6; incongruence with the literature/sources not logically defended                                                                                                                                                                                                                                                                                                                                                                                     | 5/6  |
| <b>Ries, 2018</b>                 | Narrative review                                | Text and Opinion / 6                   |                                                                                                                                                                                                                                                                                                                                                                                                                                                               | 6/6  |
| <b>Risse et al., 1990</b>         | Cohort until death                              | Cohort studies / 11                    | → item 2; similarity of exposure in groups not applicable<br>→ item 4; Unclear if confounding factors were identified<br>→ Item 5; Unclear if strategies to deal with confounding factors were stated<br>→ item 6; Unclear if the participants were free of the outcome at the start<br>→ item 7; Unclear if the outcomes were measured in a valid and reliable way<br>→ item 11; No appropriate statistical analysis used                                    | 4/9  |
| <b>Souren et al., 1997</b>        | Narrative review                                | Text and Opinion / 6                   |                                                                                                                                                                                                                                                                                                                                                                                                                                                               | 6/6  |
| <b>Tyrell and Rossor, 1988</b>    | Cross-sectional                                 | Analytical Cross-Sectional Studies / 8 | → item 2; study subjects and setting unclear described<br>→ item 3; exposure measured in a valid way was not applicable<br>→ item 6; unclear about the strategies to deal with confounding<br>→ item 7; unclear if outcomes were measured in a valid and reliable way<br>→ item 8; No appropriate statistical analysis is used                                                                                                                                | 3/7  |
| <b>Tyrell et al., 1990</b>        | Cross-sectional                                 | Analytical Cross-Sectional Studies / 8 | → item 3; exposure measured in a valid way was not applicable<br>→ item 5; no confounding factors identified<br>→ item 6; no strategies for dealing with confounding factors stated<br>→ item 8; no appropriate statistical analysis is used                                                                                                                                                                                                                  | 4/7  |
| <b>Van Deun et al., 2017</b>      | Cross-sectional on psychometric properties test | Diagnostic Test Accuracy Studies / 10  | → item 5; no threshold was used                                                                                                                                                                                                                                                                                                                                                                                                                               | 9/10 |

|                                |                         |                                        |                                                                                                                                                                                                                                                                                                                                          |     |
|--------------------------------|-------------------------|----------------------------------------|------------------------------------------------------------------------------------------------------------------------------------------------------------------------------------------------------------------------------------------------------------------------------------------------------------------------------------------|-----|
| <b>Van Deun et al., 2018</b>   | Survey                  | Qualitative research / 10              | → item 6; no statement is included in the paper of the researcher's cultural and theoretical orientation, although we know the researcher who is a qualified researcher in the field of paratonia.<br>→ item 7; no, the potential of the researcher to influence the study is not addressed<br>→ item 9; ethical approval not applicable | 7/9 |
| <b>Van Deun et al., 2019</b>   | Cross-sectional         | Analytical Cross-Sectional Studies / 8 | → item 6; unclear about the strategies to deal with confounding                                                                                                                                                                                                                                                                          | 7/8 |
| <b>Van Deun et al., 2019</b>   | CT with AB/BA crossover | Quasi-Experimental Studies / 9         | → item 7: unclear if participants received similar treatment/care other than the intervention<br>→ item 8; follow-up unclear<br>→ item 9; no control group                                                                                                                                                                               | 6/9 |
| <b>Vahia et al., 2007</b>      | Prevalence study        | Prevalence Studies / 9                 | → items 1,2,3; sample size (n=80) 39% of all patients with Alzheimer Disease (AD) seen at that specific center. May not be representative for the total population of people with AD<br>→ item 6 and 7; unclear if paratonia was assessed with a validated/reliable method                                                               | 4/9 |
| <b>Villeneuve et al., 1974</b> | Cross-sectional         | Analytical Cross-Sectional Studies / 8 | → item 3; exposure measured in a valid way was not applicable<br>→ item 5; no confounding factors identified<br>→ item 6; no strategies for dealing with confounding factors stated                                                                                                                                                      | 5/8 |

Checklist used available at Joanna Briggs Institute at <https://joannabriggs.org/critical-appraisal-tools>

\*Score: The tools determined whether a criterium was met, whether it was unclear if it was met, or if that criterium was not applicable. One point was awarded when the criterium was met. The number of points were summed and compared to the maximum points possible. If an item was not applicable, the maximum number of points was reduced by one item.

**Supplementary Table 3.** Minimal Detectable Change (MDC) and Minimal Detectable Important Change (MDIC) of MyotonPro when recording paratonia severity over time.

| <b>MyotonPro modality</b>        | <b>Mean (SD) value in people with paratonia</b> | <b>MDC<sub>95</sub></b> | <b>MDIC (SD)</b> |
|----------------------------------|-------------------------------------------------|-------------------------|------------------|
| <b>Tone, Hz</b>                  | 13.18 (1.92)                                    | 3.24                    | 0.56 (1.86)      |
| <b>Elasticity, log decrement</b> | 1.67 (0.36)                                     | 0.50                    | 0.11 (0.45)      |
| <b>Stiffness, N/m</b>            | 244.70 (36.03)                                  | 59.87                   | 1.79 (39.02)     |
| <b>Creep, Deborah number</b>     | 1.54 (0.29)                                     | 0.54                    | 0.12 (0.31)      |
| <b>MSR time, ms</b>              | 25.05 (4.58)                                    | 8.29                    | 1.69 (4.37)      |
